# Supplementary material for: Treatment of Rhenium-Containing Effluents Using Environmentally Friendly Sorbent, Saccharomyces cerevisiae Biomass
Source: MDPI journal article supplement (doi:10.3390/ma14164763), 2021-08-23
Supplement: s1 [file s1]

Supplementary Materials

# Treatment of Rhenium-Containing Effluents Using Environmentally Friendly Sorbent, *Saccharomyces cerevisiae* Biomass

Inga Zinicovskaia <sup>1,2,\*</sup>, Nikita Yushin <sup>1</sup>, Dmitrii Grozdov <sup>1</sup>, Konstantin Vergel <sup>1</sup>, Pavel Nekhoroshkov <sup>1</sup> and Elena Rodlovskaya <sup>3</sup>

<sup>1</sup> Department of Nuclear Physics, Joint Institute for Nuclear Research, Joliot-Curie Str., 6, 1419890 Dubna, Russia; ynik\_62@mail.ru (N.Y.); dsgrozdov@rambler.ru (D.G.); verkn@mail.ru (K.V.) p.nekhoroshkov@gmail.com (P.N.)

<sup>2</sup> Department of Nuclear Physics, Horia Hulubei National Institute for R&D in Physics and Nuclear Engineering, 30 Reactorului Str. MG-6 Magurele, Romania

<sup>3</sup> Laboratory for Heterochain Polymers, A.N. Nesmeyanov Institute of Organoelement Compounds of Russian Academy of Sciences, Vavilova Str., 28, 119991 Moscow, Russia; ro745@mail.ru

\* Correspondence: zinikovskaia@mail.ru; Tel.: +7-4962165609

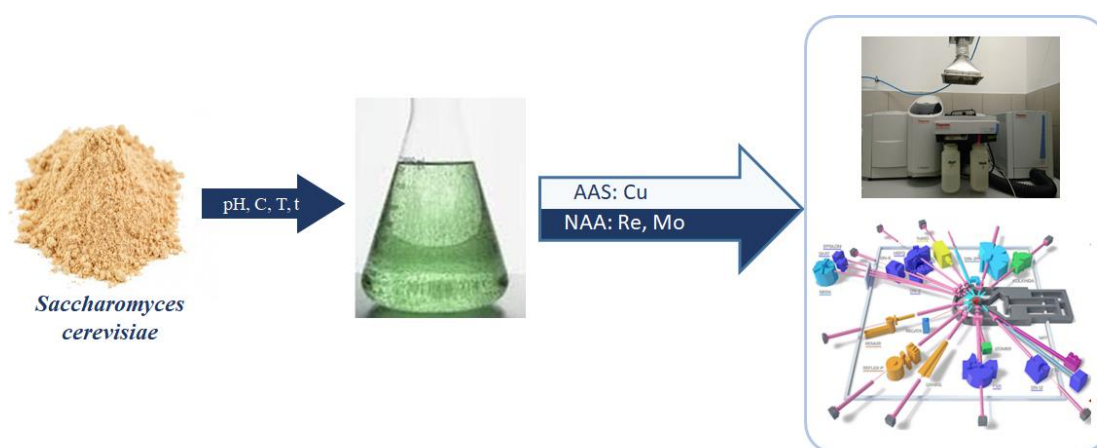

**Figure S1.** The scheme of biosorption experiment.

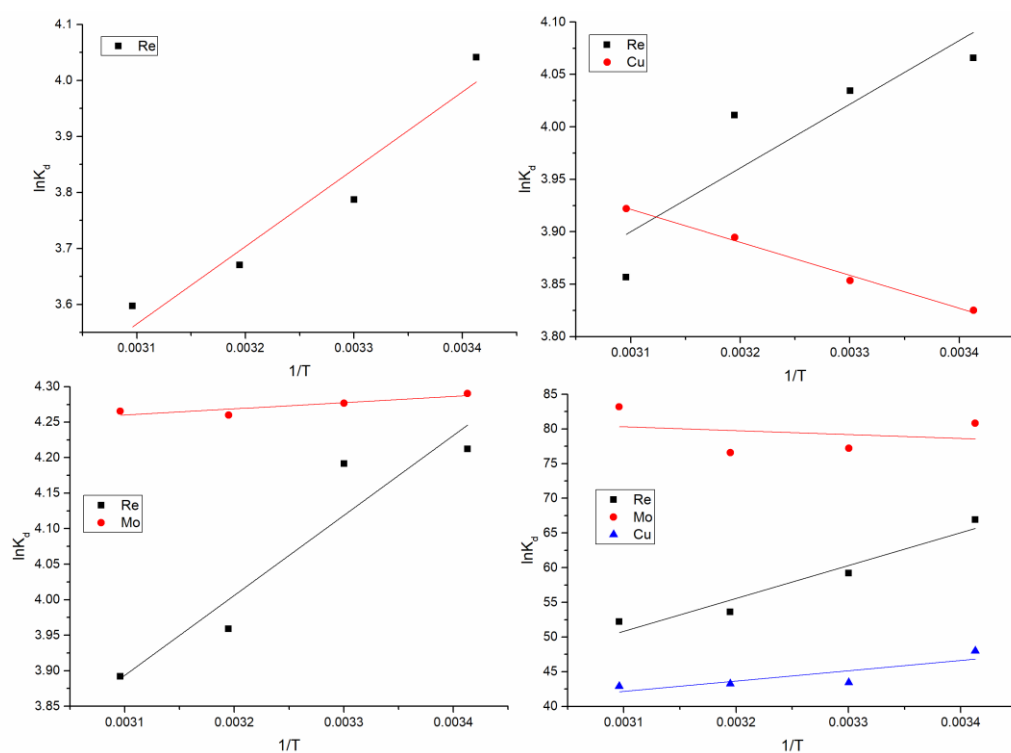

Figure S2. The linear plots of  $\ln K_d$  versus  $1/T$  for the adsorption of metal ions.
